# Supplementary material for: The role of CD8 + T lymphocytes in chronic obstructive pulmonary disease: a systematic review
Source: PubMed Central journal article supplement (PMC7806561; doi:10.1007/s00011-020-01408-z), 2020-10-10
Supplement: 11_2020_1408_MOESM5_ESM.pdf [file 11_2020_1408_MOESM5_ESM.pdf]

## **ONLINE RESEOURCE 5**

### **ELECTRONIC SUPPLEMENTARY MATERIAL (ESM-5)**

#### **INFLAMMATION RESEARCH**

**The role of CD8+ T lymphocytes in chronic obstructive pulmonary disease: a systematic review.**

**Maya Williams, Ian Todd, Lucy C. Fairclough**

**Corresponding author: Dr Lucy C. Fairclough, School of Life Sciences, The University of Nottingham, Life Sciences Building, University Park, Nottingham NG7 2RD, United Kingdom.**

**Email: [lucy.fairclough@nottingham.ac.uk](mailto:lucy.fairclough@nottingham.ac.uk)**

**Table S4: Studies investigating the cytotoxic function of CD8+ T lymphocytes in COPD.** Ten studies were identified. Seven investigated the expression of cytotoxic proteins by CD8+ T lymphocytes in COPD whilst the Fas/FasL pathway was examined in three. Expression of the programmed cell death protein 1 (PD-1) on CD8+ T lymphocytes in COPD was highlighted in one study.

| Publication                             | Title                                                                                                                | Subjects                                                                | COPD diagnosis                                                                                                                                                                     | Sample                                                   | Conclusions                                                                                                                                                                                                                                                                                                                                                                                                                              |
|-----------------------------------------|----------------------------------------------------------------------------------------------------------------------|-------------------------------------------------------------------------|------------------------------------------------------------------------------------------------------------------------------------------------------------------------------------|----------------------------------------------------------|------------------------------------------------------------------------------------------------------------------------------------------------------------------------------------------------------------------------------------------------------------------------------------------------------------------------------------------------------------------------------------------------------------------------------------------|
| Kim et al [33]<br><br>Human<br>2013     | A possible role for CD8+ and non-CD8+ cell granzyme B in early small airway remodeling in centrilobular emphysema    | 14 panlobular emphysema (PLE), 32 centrilobular emphysema (CLE), 13 HNS | Emphysema diagnosis was made based on histological exam not all patients with PLE or CLE qualified for COPD Global Initiative for Chronic Obstructive Lung Disease (GOLD) criteria | Lung tissue                                              | Volume fraction (Vv) of CD8+ T cells in small airway wall was greater in CLE than control and PLE, as was the Vv of granzyme B positive cells<br>Vv of granzyme B positive cells was greater than that of CD8+ T cells in CLE subjects, and not all CD8+ T cells were positive for granzyme B on dual staining.<br><br>There were other granzyme B positive cells – monocytes and granulocytes                                           |
| Vernooy et al [34]<br><br>Human<br>2007 | Increased Granzyme A expression in Type II Pneumocytes of Patients with Severe Chronic Obstructive Pulmonary Disease | 22 COPD, 15 controls                                                    | GOLD IV                                                                                                                                                                            | Lung tissue                                              | Granular staining for granzyme A was noted in cytotoxic lymphocytes and the same was true for granzyme B<br>However, granzyme A and granzyme B staining was also observed in type II pneumocytes and alveolar macrophages (resident lung cells)<br><br>CD8+ T cells are activated in peripheral lung tissue since they express serine proteases                                                                                          |
| Shiratsuchi [35]<br><br>Human<br>2011   | Measurement of soluble perforin, a marker of CD8+ T lymphocyte activation in epithelial lining fluid                 | 30 COPD, 11 ex- smokers, 10 non-smokers                                 | GOLD                                                                                                                                                                               | Epithelial lining fluid (central and peripheral airways) | Levels of perforin were significantly higher in COPD than in non-smokers and ex-smokers for both central and peripheral airways<br>There was no significant correlation between smoking status and perforin levels in either central or peripheral airways in COPD patients<br><br>Perforin level in peripheral airways was closely correlated with lung function (FEV <sub>1</sub> , FEV <sub>1</sub> /FVC and lung diffusion capacity) |

|                                                      |                                                                                                                                      |                                                                                                 |                                                                                            |                  |                                                                                                                                                                                                                                                                                                                                                                                                                                                                                                                                                                                                                                                                                                                                                                   |
|------------------------------------------------------|--------------------------------------------------------------------------------------------------------------------------------------|-------------------------------------------------------------------------------------------------|--------------------------------------------------------------------------------------------|------------------|-------------------------------------------------------------------------------------------------------------------------------------------------------------------------------------------------------------------------------------------------------------------------------------------------------------------------------------------------------------------------------------------------------------------------------------------------------------------------------------------------------------------------------------------------------------------------------------------------------------------------------------------------------------------------------------------------------------------------------------------------------------------|
| Domagala-Kulawik et al [36]<br><br>Human<br><br>2007 | Increased proportion of Fas positive CD8+ cells in peripheral blood of patients with COPD                                            | 18 COPD, 12 smoker controls (S), 12 healthy non- smokers (HNS)                                  | American Thoracic Society (ATS)/ European Respiratory Society guidelines                   | Peripheral blood | Elevated proportion of CD8+ cells expressing Fas (CD95) in COPD groups compared to controls. The proportion of CD8+ T cells positive for CD95 as a percentage of all lymphocytes was increased in COPD compared to controls. The proportion of Fas positive CD8+ T cells was significantly correlated with reduced lung function (FEV <sub>1</sub> /FVC) and hypoxaemia (arterial blood oxygen pressure) The proportion of Fas positive CD8+ T cells was significantly correlated with mean pack years smoked in the whole smoking group, but not with only COPD                                                                                                                                                                                                  |
| Domagala-Kulawik et al [37]<br><br>Human<br><br>2011 | Fas+ lymphocytes and CD4+/CD25+ cells in peripheral blood of never smoking patients with chronic obstructive pulmonary disease       | 12 never smokers with COPD, 18 smokers with COPD, 12 S, 12 HNS                                  | Recommendations of the Polish society of lung diseases about diagnosis and therapy of COPD | Peripheral blood | The proportion of Fas positive CD8+ T cells in both never-smokers and smokers with COPD was significantly higher than healthy controls. This shows a disease related increase in Fas expression. There was no difference in the proportion of CD8+/Fas+ lymphocytes between the never-smoking and current smoking COPD groups.                                                                                                                                                                                                                                                                                                                                                                                                                                    |
| McKendry et al [38]<br><br>Human<br><br>2016         | Dysregulation of antiviral function of CD8+ T cells in the chronic obstructive pulmonary disease lung. Role of the PD-1 – PD-L1 Axis | 33 COPD (1 never, 20 ex-, 12 current smokers), 24 controls (6 never, 15 ex-, 3 current smokers) | Not specified                                                                              | Lung tissue      | A significantly higher proportion of CD8+ T cells from COPD expressed programmed cell death protein 1 (PD-1) than cells from controls. Ex-vivo model of influenza X31 infection. PD-1 expression was upregulated on CD8+ T cells in both control and COPD explants in response to X31 infection.<br><br>The percentage of CD8+ T cells from control subjects and patients with COPD expressing PD-1 was increased in response to X31. CD8+ T cells from controls significantly upregulated CD107a in response to viral infection whereas this did not happen in CD8+ T cells derived from COPD explants. CD107a is a degranulation marker, so these results conclude that CD8+ T cells in the lung may have an impaired degranulation response to viral infection |

|                                                            |                                                                                                                                  |                                                                                                           |             |                                                                                        |                                                                                                                                                                                                                                                                                                                                                                                                                                                                                                                                                                                                                                                                                                                                                                                                                                                                                                               |
|------------------------------------------------------------|----------------------------------------------------------------------------------------------------------------------------------|-----------------------------------------------------------------------------------------------------------|-------------|----------------------------------------------------------------------------------------|---------------------------------------------------------------------------------------------------------------------------------------------------------------------------------------------------------------------------------------------------------------------------------------------------------------------------------------------------------------------------------------------------------------------------------------------------------------------------------------------------------------------------------------------------------------------------------------------------------------------------------------------------------------------------------------------------------------------------------------------------------------------------------------------------------------------------------------------------------------------------------------------------------------|
| <p>Hodge et al [39]</p> <p>Human and Mouse</p> <p>2011</p> | <p>Role of increased CD8/CD28 null T cells and alternative co-stimulatory molecules in chronic obstructive pulmonary disease</p> | <p>30 COPD- CS, 18 COPD-exS, 34 S, 15 HNS</p> <p>Mice – 10 smoke exposed, 6 sham exposed for 12 weeks</p> | <p>GOLD</p> | <p>Peripheral blood</p> <p>Mice – Bronchoalveolar lavage (BAL), lung tissue, blood</p> | <p>There were significantly increased CD8/CD28<sup>null</sup> T cells in the peripheral blood of COPD-CS and COPD-exS compared to controls. Increased expression of 4-1BB in both COPD groups on CD8+ T cells. CTLA4 was increased on CD8+ T cells from S and COPD-CS. OX40 was significantly increased on CD8+ T cells from S and COPD-CS. There were no significant differences in CD40L</p> <p>CD8/CD28<sup>null</sup> cells expressed significantly more IFN-g, granzyme and perforin than CD8/CD28+ T cells. They also expressed significantly more OX40, 4-1BB, CTLA4 when stimulated than CD8/CD28+ T cells</p> <p>Mice: no significant differences in the percentage of CD8+ T cells in any compartment following 12 weeks of smoke exposure. However there was a significant increase in CD8/CD28<sup>null</sup> T cells in airway (BAL) and trend for an increase in lung and peripheral blood.</p> |
|------------------------------------------------------------|----------------------------------------------------------------------------------------------------------------------------------|-----------------------------------------------------------------------------------------------------------|-------------|----------------------------------------------------------------------------------------|---------------------------------------------------------------------------------------------------------------------------------------------------------------------------------------------------------------------------------------------------------------------------------------------------------------------------------------------------------------------------------------------------------------------------------------------------------------------------------------------------------------------------------------------------------------------------------------------------------------------------------------------------------------------------------------------------------------------------------------------------------------------------------------------------------------------------------------------------------------------------------------------------------------|
